# Supplementary material
Source: PubMed Central journal article supplement (PMC5012918)
Supplement: NIHMS791218-supplement-Supp_Info.pdf [file NIHMS791218-supplement-Supp_Info.pdf]

# Three Measures of Explained Variation for Correlated Survival Data

under the Proportional Hazards Mixed-effects Model

## Supplemental Materials

Gordon Honerkamp-Smith and Ronghui Xu

March 2, 2016

A second estimate of  $\Omega^2$  can be based on the sample variance of the  $\hat{\eta}_{ij} = \hat{\beta}'\mathbf{Z}_{ij} + \hat{\mathbf{b}}'_{ij}\mathbf{W}_{ij}$ 's:

$$R_1^2 = 1 - \frac{\pi^2/6}{\sum_{i,j}(\hat{\eta}_{ij} - \bar{\hat{\eta}})^2/(N-1) + \pi^2/6}, \quad (1)$$

where  $N = \sum_{i=1}^m n_i$  is the total number of observations. As discussed in the main paper for the  $\mathbf{b}_i$ 's to be well estimated, the cluster sizes  $n_i$  need to be reasonably large, and this is when we expect  $R_1^2$  to be a reasonable estimate of  $\Omega^2$ . We include  $R_1^2$  in the simulations here.

All the simulations below used 25 clusters with 25 observations each (25×25), and the setup is otherwise the same as described in the main paper.

Figure 1 shows how the performance of the measures depends on the amount of censoring in the data. The measures  $R^2$  and  $R_1^2$  are mostly unaffected by the level of censoring, though slightly more variation is seen in  $R_1^2$ . For  $R_{res}^2$ , the amount of censoring has a modest effect, with the value of  $R_{res}^2$  increasing as the amount of censoring increases for a fixed value of  $\beta$ ; this effect appears to be independent of the magnitude of  $\beta$ . The measure  $\hat{\rho}^2$  exhibits the same relationship but also appears to be more sensitive to the amount of censoring. As discussed in O'Quigley *et al.* (2005), this dependence of  $\hat{\rho}^2$  on the censoring appears to a

large extent affected by the finite follow up time  $\tau$ .

Also of interest is whether the measures depend on the distribution of the covariates  $Z$ . Here we fix the variance of  $Z$  so that we are comparing the discreteness, skewness and higher moments of the distribution; note that otherwise rescaling  $Z$  by a non-zero constant just leads to multiplying  $\beta$  by a constant. In Figure 2, simulations were carried out using four different distributions for the covariate  $Z$ : Normal, Uniform, Bernoulli, and Exponential. The parameters of these distributions were chosen so that  $E[Z_{ij}] = 0.5$  and  $\text{Var}[Z_{ij}] = 0.25$  in each case. While all four sample based measures appear to be largely unaffected by the covariate distribution, the plots suggests that  $R_{res}^2$  and  $\hat{\rho}^2$  show a slight dependence on the distribution of the covariates.

Finally, we investigate whether the measures are sensitive to the baseline survival distribution. We carried out simulations using the baseline hazard function  $\lambda_0(t) = a/b \cdot (t/b)^{a-1} \exp\{-(x/b)^a\}$ , where  $a, b > 0$ . This corresponds to a Weibull distribution with shape parameter  $a$  and scale parameter  $b$ . In Figure 3, we fixed  $b = 1$  and varied the shape parameter  $a$ ; note that  $a = 1$  corresponds to the standard exponential distribution that was used in the other simulations studies. The results in Figure 3 suggest that all four measures are not sensitive to the baseline survival distribution.

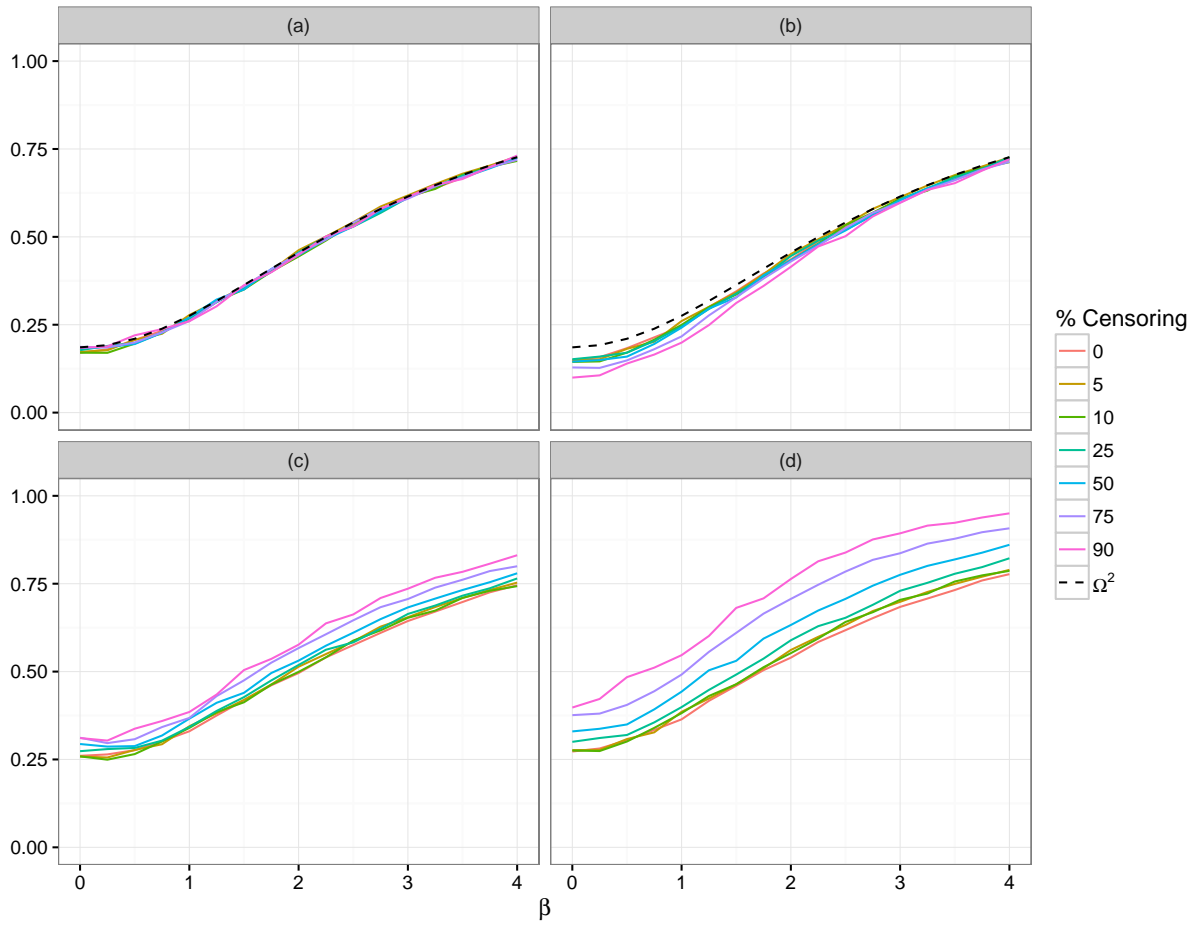

Figure 1: Performance of the measures as the percentage of censored failure times varies: (a)  $R^2$ , (b)  $R_1^2$ , (c)  $R_{res}^2$ , (d)  $\hat{\rho}^2$ .

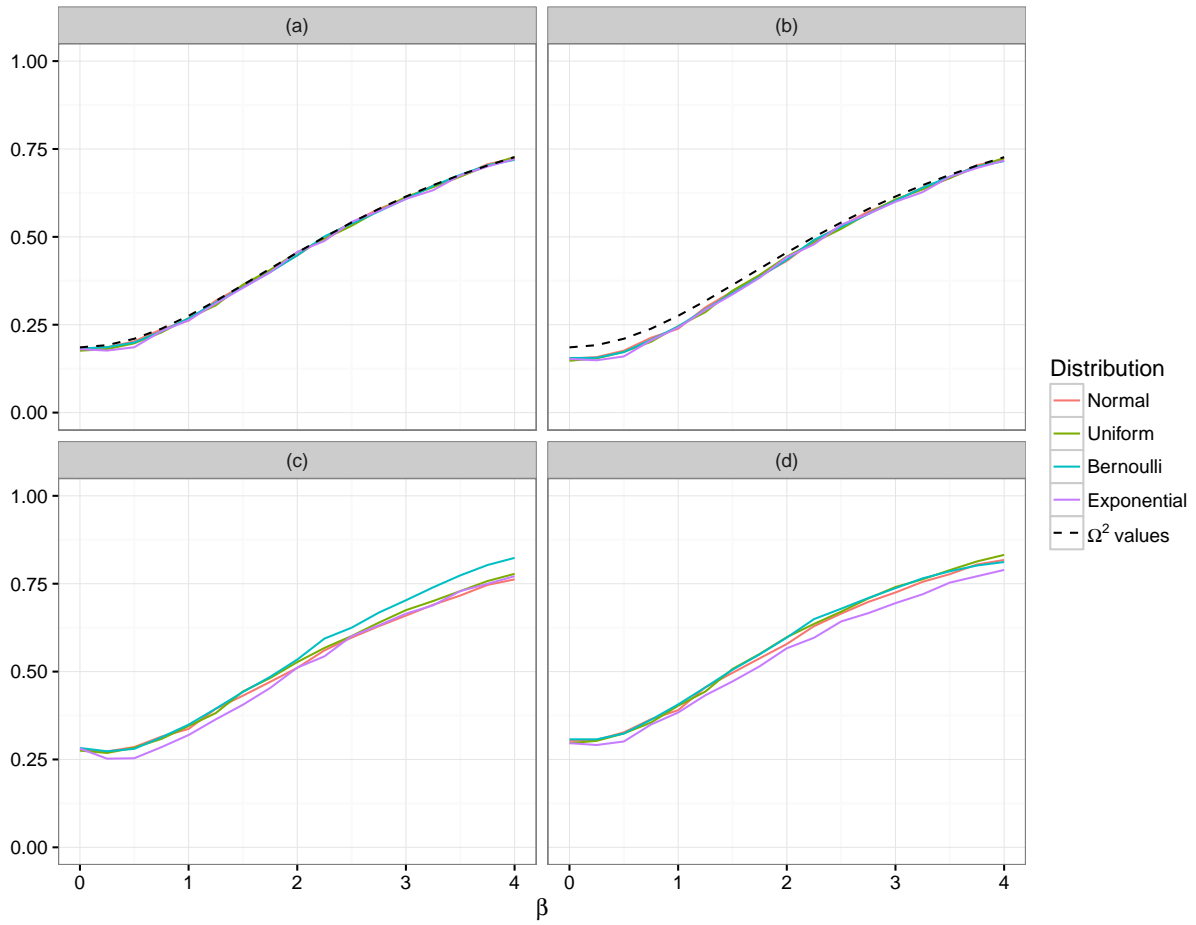

Figure 2: Simulations for the measures with different covariate distributions: (a)  $R^2$ , (b)  $R_1^2$ , (c)  $R^2_{res}$ , (d)  $\hat{\rho}^2$ .

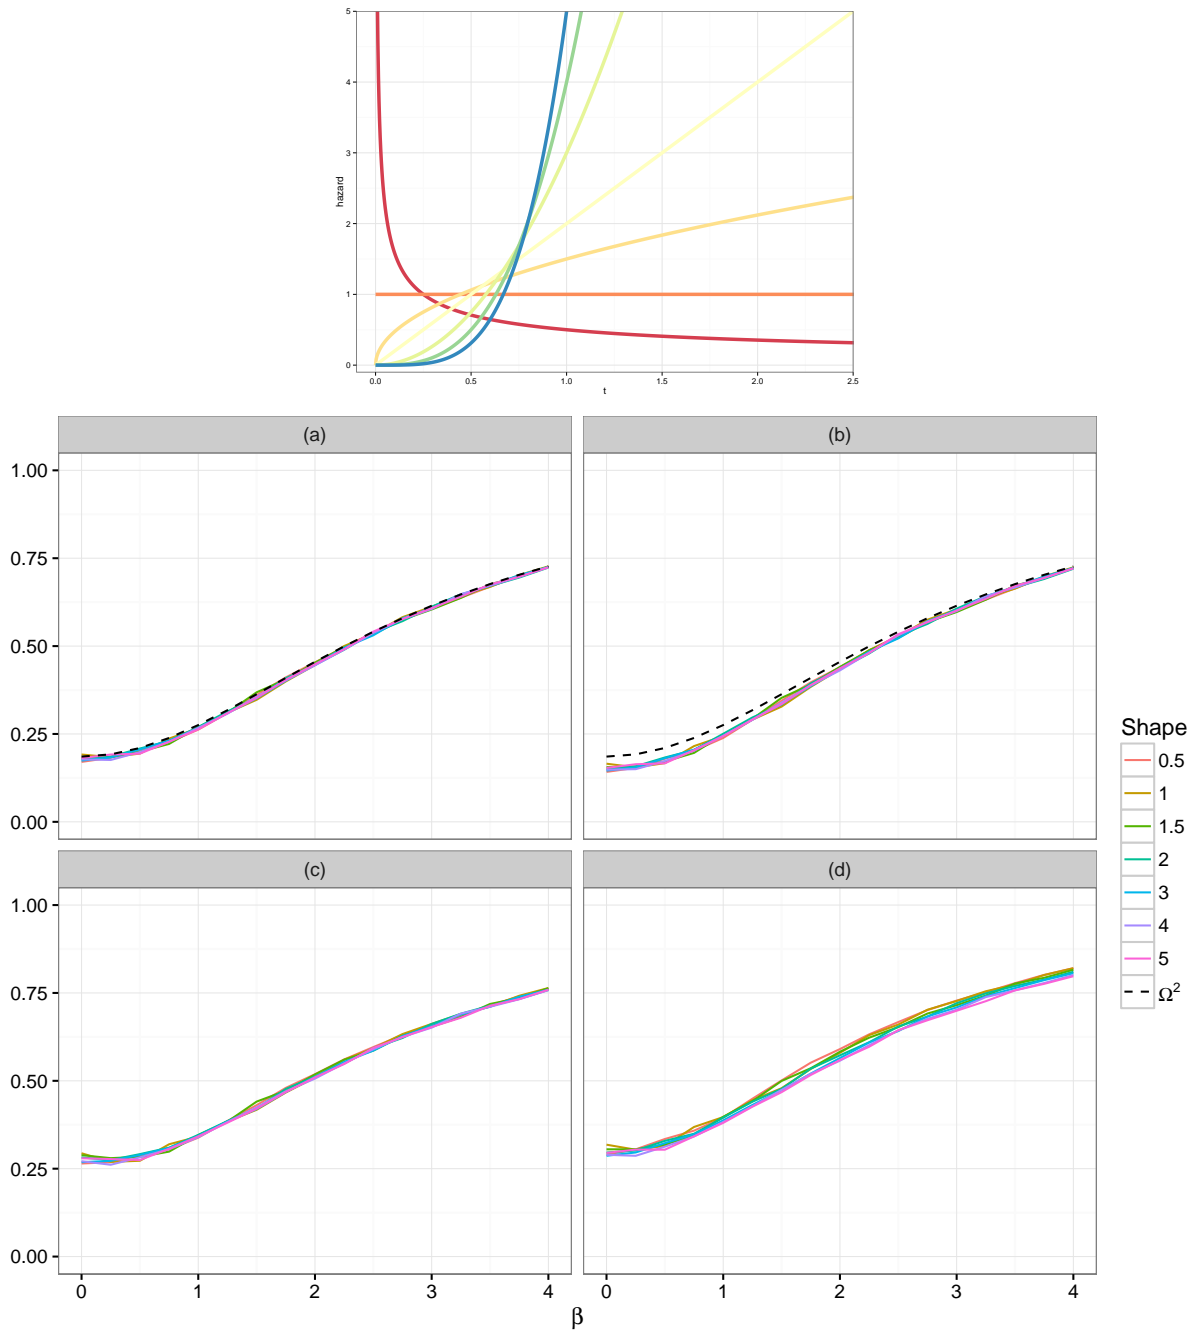

Figure 3: Top: plots of the hazard function for the Weibull distribution with varying shape parameter  $a$  and fixed scale parameter  $b = 1$ . Bottom: simulations for the  $R^2$  measures with different baseline survival distributions: (a)  $R^2$ , (b)  $R_1^2$ , (c)  $R_{res}^2$ , (d)  $\hat{\rho}^2$ .
